# Supplementary material
Source: PubMed Central journal article supplement (PMC6118072)
Supplement: kwy102_bostick_web_material_final.pdf [file kwy102_bostick_web_material_final.pdf]

**Web Table 1.** Vitamin D Binding Protein (GC, Group Component) Isoforms' Genotype Information in CPRU and MAP Case-Control Studies of Incident, Sporadic Colorectal Adenomas (United States, 1991-2002)

| GC Isoform                | Genotype encoding each isoform |           | No. cases/controls genotyped in CPRU study | No. cases/controls genotyped in MAP study |
|---------------------------|--------------------------------|-----------|--------------------------------------------|-------------------------------------------|
|                           | rs7041                         | rs3755967 |                                            |                                           |
| <i>Gc1s-1s</i>            | GG                             | GG        | 99/111                                     | 29/55                                     |
| <i>Gc1s-1f</i>            | GT                             | GG        | 56/58                                      | 14/22                                     |
| <i>Gc1f-1f</i>            | TT                             | GG        | 9/6                                        | 2/5                                       |
| <i>Gc2-1s</i>             | GT                             | AG        | 103/106                                    | 31/55                                     |
| <i>Gc2-1f</i>             | TT                             | AG        | 29/34                                      | 15/13                                     |
| <i>Gc2-2</i>              | TT                             | AA        | 21/42                                      | 9/14                                      |
| <i>Gcx-x<sup>a</sup></i>  | GG                             | AA        | 0/0                                        | 0/0                                       |
| <i>Gc2-x<sup>a</sup></i>  | GT                             | AA        | 1/0                                        | 0/0                                       |
| <i>Gc1s-x<sup>a</sup></i> | GG                             | AG        | 0/3                                        | 0/0                                       |

Abbreviations: CPRU, Minnesota Cancer Prevention Research Unit Case-Control study of Colorectal Polyps; MAP, Markers of Adenomatous Polyps Study

<sup>a</sup> Patients with the fourth possible isoform combination (rs7041\*G + rs3755967\*A, denoted as *Gcx*) were excluded from subsequent analyses of the isoforms due to low numbers ( $n = 4$ ). For patients with heterozygous genotypes at both SNPs, the *Gc2-1s* combined genotype was assumed (i.e., rs7041\*G + rs3755967\*G [*Gc1s*] on one chromosome and rs4588\*T + rs3755967\*A [*Gc2*] on the other chromosome) versus the other theoretical combination *Gc1f-1x* (rs7041\*G + rs3755967\*A [*Gc1x*] on one chromosome and rs7041\*T + rs3755967\*G [*Gc1f*] on the other) given the rarity of the *Gcx* isoform.

**Web Table 2.** Associations<sup>a</sup> of GC Genotypes With Circulating 25(OH)D<sub>3</sub> Concentrations (ng/mL) in the CPRU and MAP Case-Control Studies of Incident, Sporadic Colorectal Adenomas (United States, 1991-2002)<sup>b</sup>

| GC SNP (A>a)                                          | Genotype     | CPRU Study (n = 678) <sup>c</sup> |                     |              | MAP Study (n = 264) <sup>d</sup> |                     |              | Pooled studies (n = 942) <sup>e</sup> |                     |              |
|-------------------------------------------------------|--------------|-----------------------------------|---------------------|--------------|----------------------------------|---------------------|--------------|---------------------------------------|---------------------|--------------|
|                                                       |              | No. (AA/Aa/aa)                    | $\beta$ Coefficient | 95% CI       | No. (AA/Aa/aa)                   | $\beta$ Coefficient | 95% CI       | No. (AA/Aa/aa)                        | $\beta$ Coefficient | 95% CI       |
| <b>Among controls (n = 524)</b>                       |              |                                   |                     |              |                                  |                     |              |                                       |                     |              |
| rs7041 (G>T)                                          | Per T allele | 114/164/82                        | -1.26               | -2.67, 0.14  | 74/92/39                         | -2.30               | -4.57, -0.03 | 188/256/121                           | -1.58               | -2.77, -0.39 |
| rs3755967 (G>A) <sup>f</sup>                          | Per A allele | 175/143/42                        | -2.72               | -4.20, -1.24 | 108/79/18                        | -2.65               | -5.18, -0.12 | 283/22/60                             | -2.69               | -3.97, -1.42 |
| <b>Among cases (n = 418)</b>                          |              |                                   |                     |              |                                  |                     |              |                                       |                     |              |
| rs7041 (G>T)                                          | Per T allele | 99/160/59                         | -1.83               | -3.24, -0.41 | 40/63/34                         | -5.02               | -7.96, -2.07 | 139/223/93                            | -2.62               | -3.90, -1.33 |
| rs3755967 (G>A) <sup>f</sup>                          | Per A allele | 164/132/22                        | -3.00               | -4.57, -1.44 | 65/60/11                         | -6.32               | -9.70, -2.94 | 229/192/33                            | -3.74               | -5.17, -2.31 |
| <b>Among cases and controls (n = 942)<sup>d</sup></b> |              |                                   |                     |              |                                  |                     |              |                                       |                     |              |
| rs7041 (G>T)                                          | Per T allele | 162/241/114                       | -1.54               | -2.53, -0.54 | 114/115/73                       | -3.31               | -5.09, -1.53 | 283/356/187                           | -2.05               | -2.92, -1.18 |
| rs3755967 (G>A) <sup>f</sup>                          | Per A allele | 339/275/64                        | -2.86               | -3.93, -1.79 | 173/139/29                       | -3.89               | -5.89, -1.88 | 512/414/93                            | -3.15               | -4.10, -2.20 |

Abbreviations: a, minor allele; A, major allele; CI, confidence interval; Coef, Coefficient; CPRU, Cancer Prevention Research Unit; GC, group component (encoding vitamin D binding protein); MAP, Markers of Adenomatous Polyps.

<sup>a</sup> From multivariable linear regression.

<sup>b</sup> Limited to Caucasians genotyped for GC rs7041 and rs3755967 (n = 942).

<sup>c</sup>  $\beta$  coefficients adjusted for age (continuous) and sex.

<sup>d</sup>  $\beta$  coefficients adjusted for age (continuous), sex, and study (CPRU, MAP).

<sup>e</sup>  $\beta$  coefficients adjusted for age (continuous), sex, study (CPRU, MAP) and case-control status.

<sup>f</sup> rs3755967 is a proxy for rs4588 ( $r^2 = 1.0$ , CEU population, 1000 genomes, phase 3).

**Web Table 3.** Mean Circulating 25(OH)D<sub>3</sub> Concentrations (ng/mL) by Vitamin D Binding Protein (GC, Group Component) Isoforms in Pooled CPRU and MAP Case-Control Studies of Incident, Sporadic Colorectal Adenomas (United States, 1991-2002)

| GC isoform     | Isoform Genotype |           | Cases/Controls (n) | Least-squares means <sup>a</sup> | 95% CI     | P <sup>b</sup> |
|----------------|------------------|-----------|--------------------|----------------------------------|------------|----------------|
|                | rs7041           | rs3755967 |                    |                                  |            |                |
| <i>Gc1s-1s</i> | GG               | GG        | 128/166            | 27.4                             | 26.2, 28.5 | Referent       |
| <i>Gc1s-1f</i> | GT               | GG        | 70/80              | 26.8                             | 25.3, 28.4 | 0.99           |
| <i>Gc1f-1f</i> | TT               | GG        | 11/11              | 25.5                             | 21.5, 29.6 | 0.96           |
| <i>Gc2-1s</i>  | GT               | AG        | 134/161            | 23.7                             | 22.6, 24.8 | <0.0001        |
| <i>Gc2-1f</i>  | TT               | AG        | 44/47              | 25.5                             | 23.5, 27.4 | 0.57           |
| <i>Gc2-2</i>   | TT               | AA        | 30/56              | 20.7                             | 18.6, 22.7 | <0.0001        |
| <i>Gc1-1</i>   | GG/GT/TT         | GG        | 209/257            | 27.1                             | 26.2, 28.0 | Referent       |
| <i>Gc1-2</i>   | GT/TT            | AG        | 178/208            | 24.1                             | 23.1, 25.0 | 0.01           |
| <i>Gc2-2</i>   | TT               | AA        | 30/56              | 20.7                             | 18.6, 22.7 | <0.0001        |

Abbreviations: CI, confidence interval; CPRU, Cancer Prevention Research Unit; GC, group component (encoding vitamin D binding protein); MAP, Markers of Adenomatous Polyps.

<sup>a</sup> Least-squares means estimated using linear regression models CEU population, 1000 genomes, phase 3

<sup>b</sup> Calculated using Tukey's test for multiple comparisons.
